# Supplementary material for: Assembly of alpha-helical transmembrane pores through an intermediate state
Source: Royal Society of Chemistry journal article supplement (doi:10.1039/d2nr00556e), 2022-01-01
Supplement: d2nr00556e1.pdf [file d2nr00556e1.pdf]

## Supplementary Information

### Assembly of alpha-helical transmembrane pores through the intermediate state

Neethu Puthumadathil<sup>1,2†</sup>, Smrithi R Krishnan<sup>1,2†</sup>, Greeshma S Nair<sup>1</sup>, and Kozhinjampara R Mahendran<sup>1\*</sup>

<sup>†</sup>Contributed equally to this work

<sup>1</sup>Membrane Biology Laboratory, Transdisciplinary Research Program, Rajiv Gandhi Centre for Biotechnology, Thiruvananthapuram 695014, India.

<sup>2</sup>Manipal Academy of Higher Education, Manipal, Karnataka, India-576104

\*To whom correspondence should be addressed

\*e-mail: [mahendran@rgcb.res.in](mailto:mahendran@rgcb.res.in)

## Supplementary Materials

The following materials were used for the study: 1,2-diphytanoyl-*sn*-glycero-3-phosphocholine (DPhPC, Avanti Polar Lipids), pentane (Sigma-Aldrich Merck), hexadecane (Sigma-Aldrich Merck), n-dodecyl  $\beta$ -D-maltoside (DDM, Sigma-Aldrich Merck), Sodium dodecyl sulfate (SDS, Sigma-Aldrich), Genapol (Sigma-Aldrich), octakis-(6-amino-6-deoxy)- $\gamma$ -cyclodextrin octahydrochloride (am $\gamma$ CD, AraChem Cyclodextrin-Shop), potassium chloride (Sigma-Aldrich Merck), 4-(2-hydroxyethyl)-1-piperazineethanesulfonic acid (HEPES, Sigma-Aldrich Merck), ethylenediaminetetraacetic acid disodium salt (EDTA, Sigma-Aldrich Merck), dithiothreitol (DTT, Sigma-Aldrich Merck), sodium chloride (Sigma-Aldrich Merck), 2-Propanol (Sigma-Aldrich Merck), Acetone(Sigma-Aldrich Merck), all other reagents (Sigma-Aldrich Merck). All pPorU peptides were purchased from Peptide Protein Research Ltd at >95% purity (HPLC) as lyophilized powders.

### Supplementary Table

|                       | -50 mV   | -75 mV   | -100 mV |
|-----------------------|----------|----------|---------|
| Residual current (pA) | -252.177 | -268.521 | -16.333 |
| $I_{\%Res}$           | 100      | 70.7     | 3.2     |

**Table 1: Residual current after addition of cationic gamma cyclodextrins**

Table shows increased pore closure with increasing voltage based on residual current after adding 10  $\mu$ M cationic gamma cyclodextrins ( $\alpha$ CD) to cis side. Residual current as a percentage of open state current ( $I_{\%Res}$ ) is shown.

## Supplementary Figures

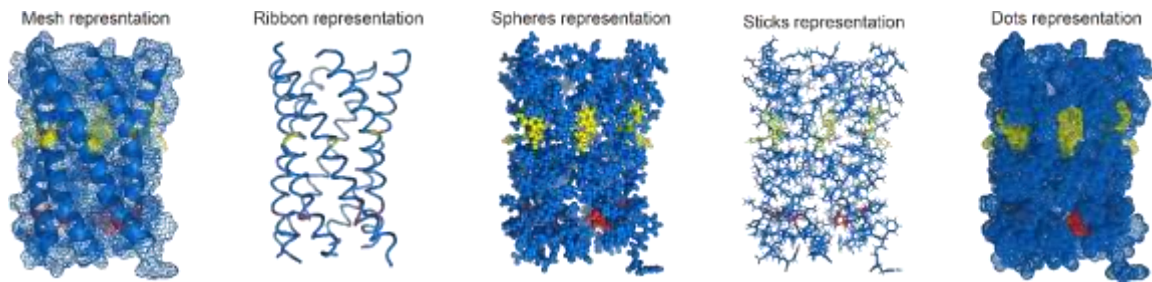

**Fig. S1: Modeled Structure of pPorU pores**

Modeled structure of pPorU pores in different representations: Mesh, Ribbon, Spheres, Sticks and Dots. The tryptophan residues are highlighted in yellow and proline residues are highlighted in red.

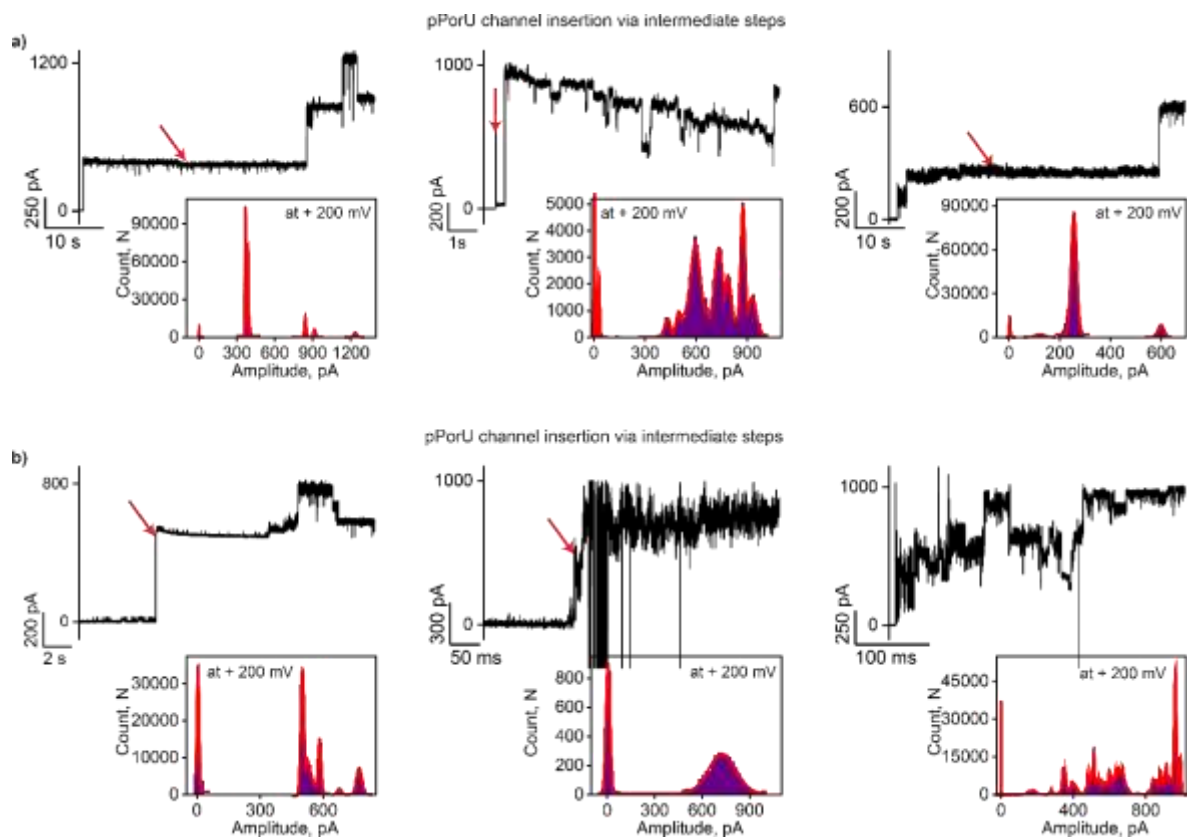

**Fig. S2: Real-time insertions of single pPorU pores into planar lipid bilayers**

**a)** Electrical recording of single pPorU channel insertion into DPhPC lipid bilayer at +200 mV via intermediate step. **b)** Electrical recording of single pPorU channel insertion into DPhPC lipid bilayer at +200 mV via intermediate step. Inset shows the corresponding all-points amplitude histogram. The current signals were filtered at 2 kHz and sampled at 10 kHz. Electrolyte: 1 M KCl, 10 mM HEPES, pH 7.4.

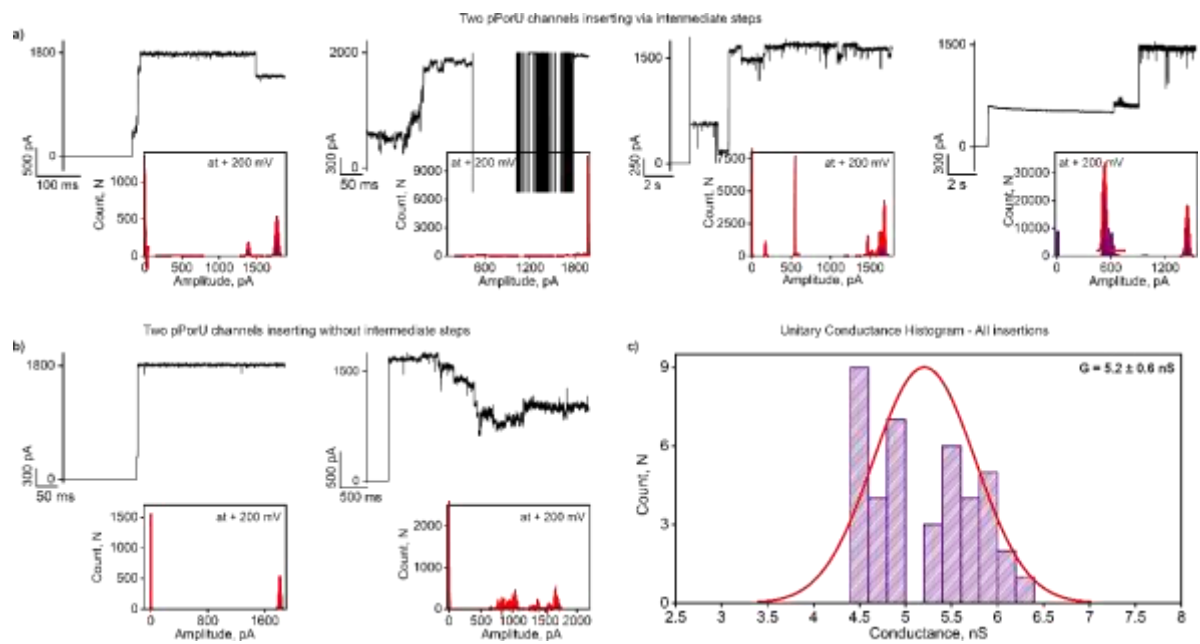

**Fig. S3: Large stable pPorU pores in planar lipid bilayers at different conditions**

**a)** Electrical recording of two pPorU channels inserted into DPhPC lipid bilayer at +200 mV via intermediate steps. **b)** Electrical recording of two pPorU channels inserted into DPhPC lipid bilayer at +200 mV without an intermediate step. **c)** The unitary conductance histogram based on all pPorU channel insertions shown here was obtained by fitting the distribution to a single Gaussian ( $n = 41$ ). Inset shows the corresponding all-points amplitude histogram. The current signals were filtered at 2 kHz and sampled at 10 kHz. Electrolyte: 1 M KCl, 10 mM HEPES, pH 7.4.

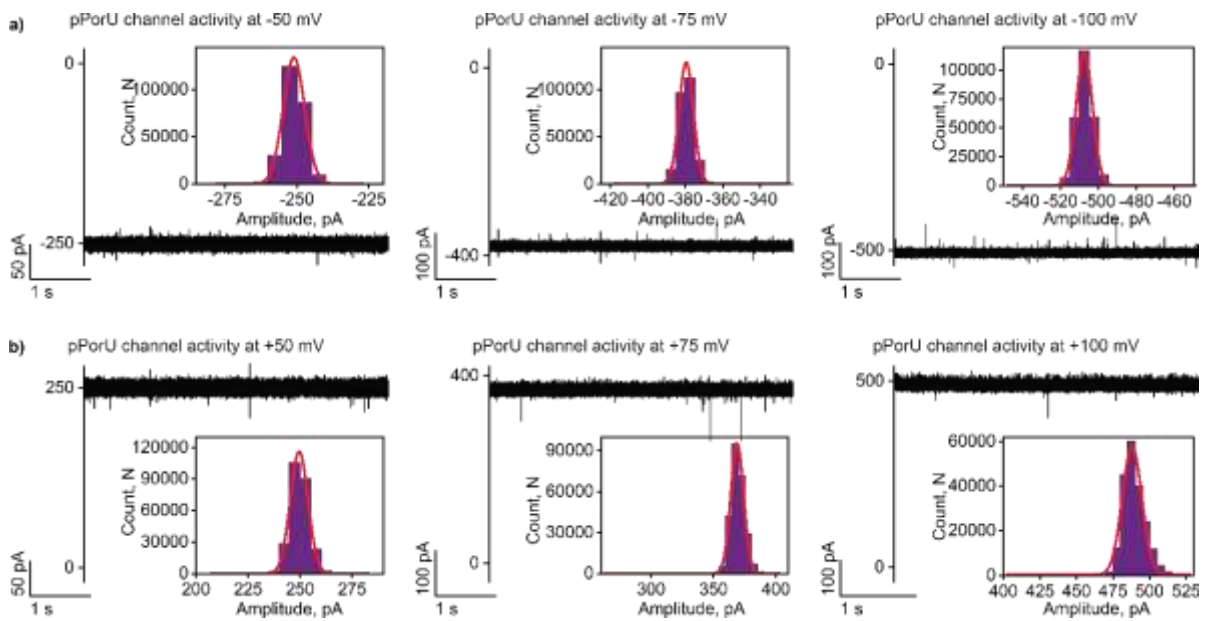

**Fig. S4: Gating of large pPorU pores at different voltages**

**a)** Electrical recording of pPorU channel in DPhPC lipid bilayer at -50 mV, -75 mV and -100 mV. **b)** Electrical recording of pPorU channel in DPhPC lipid bilayer at +50 mV, +75 mV and +100 mV. Inset shows the corresponding all-points amplitude histogram. The current signals were filtered at 10 kHz and sampled at 50 kHz. Electrolyte: 1 M KCl, 10 mM HEPES, pH 7.4.

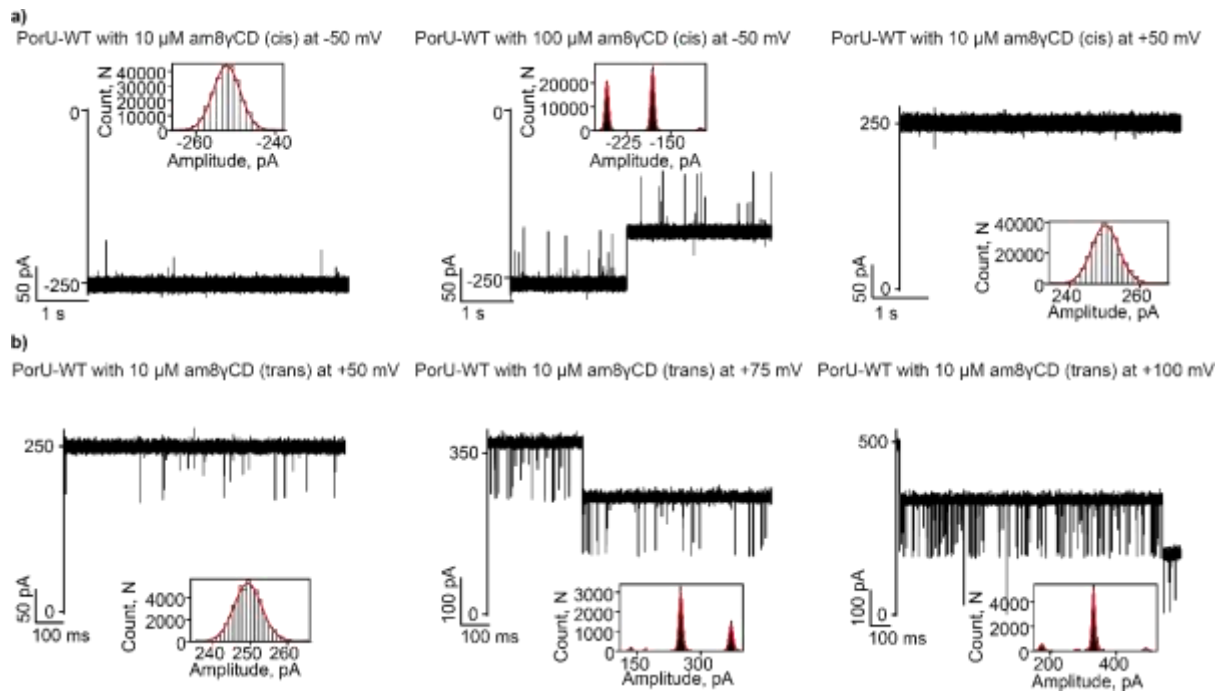

**Fig. S5: Interaction of cationic Gamma CD with large pPorU pores**

**a)** Electrical recordings showing the interaction of cationic gamma-cyclodextrin (am $\gamma$ CD) with single pPorU pore (10  $\mu$ M, cis) at -50 mV, (100  $\mu$ M, cis) at -50 mV and (10  $\mu$ M, cis) at +50 mV. **b)** Electrical recordings showing the interaction of cationic gamma-cyclodextrin (am $\gamma$ CD) with single pPorU pore (10  $\mu$ M, trans) at +50 mV, +75 mV and +100 mV. Inset shows the corresponding all-points amplitude histogram and ion current recordings at an expanded time scale. The current signals were filtered at 10 kHz and sampled at 50 kHz. Electrolyte: 1 M KCl, 10 mM HEPES, pH 7.4.



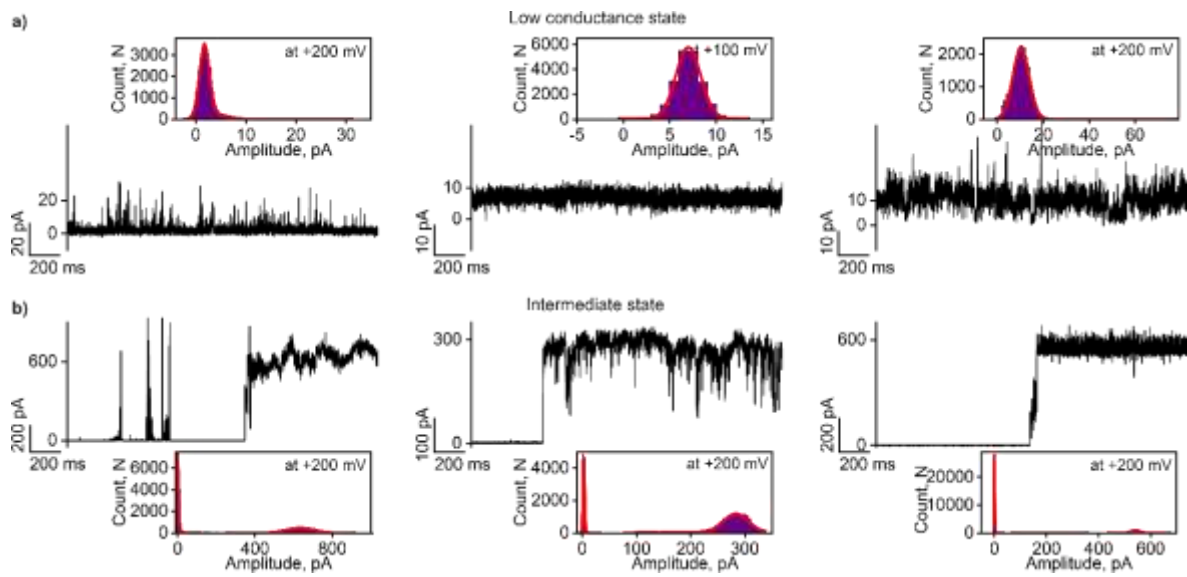

**Fig. S6: Intermediate states of pPorU pores formed at lower voltages**

a) Electrical recording of low conductance states at +100 mV and +200 mV. b) Electrical recording of different intermediate states at +200 mV showing higher current. Inset shows the corresponding all-points amplitude histogram. The current signals were filtered at 2 kHz and sampled at 10 kHz. Electrolyte: 1 M KCl, 10 mM HEPES, pH 7.4.

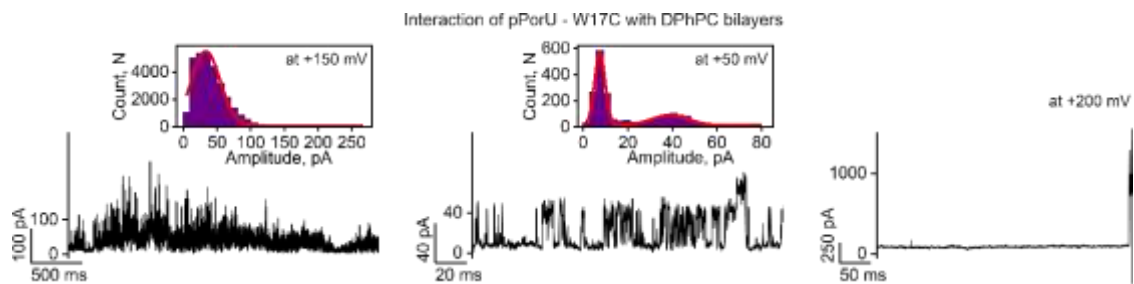

**Fig. S7: Electrical recordings of pPorU-W17C peptides in planar lipid bilayers**

Electrical recording of the interaction of pPorU-W17C peptides with DPhPC lipid bilayer showing fluctuating interaction at +150 mV. Electrical recording showing the interaction of the pPorU-W17C peptides with DPhPC lipid bilayer showing two states at +50 mV. Electrical recording of the interaction of pPorU-W17C peptides with the DPhPC lipid bilayer showing the disruption of the bilayer at +200 mV. Inset shows the corresponding all-points amplitude histogram. The current signals were filtered at 2 kHz and sampled at 10 kHz. Electrolyte: 1 M KCl, 10 mM HEPES, pH 7.4.

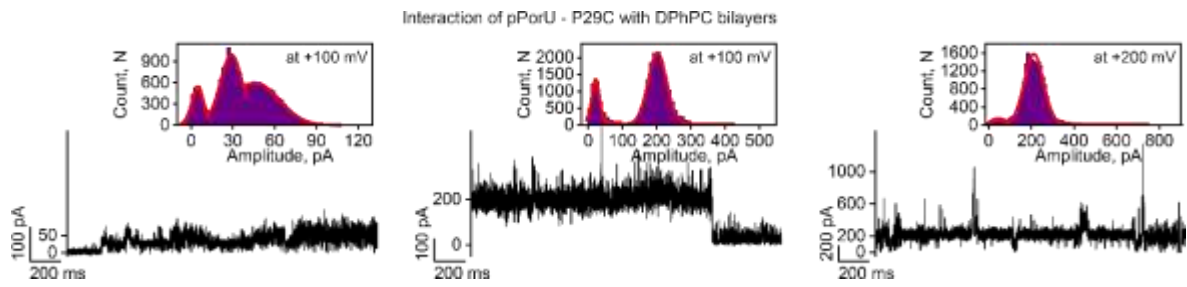

**Fig. S8: Electrical recordings of pPorU-P29C peptides in planar lipid bilayers**

Electrical recordings of pPorU-P29C channel activity in DPhPC lipid bilayer showing conductance similar to intermediate steps at +100mV and +200 mV. Inset shows the corresponding all-points amplitude histogram. The current signals were filtered at 2 kHz and sampled at 10 kHz. Electrolyte: 1 M KCl, 10 mM HEPES, pH 7.4.

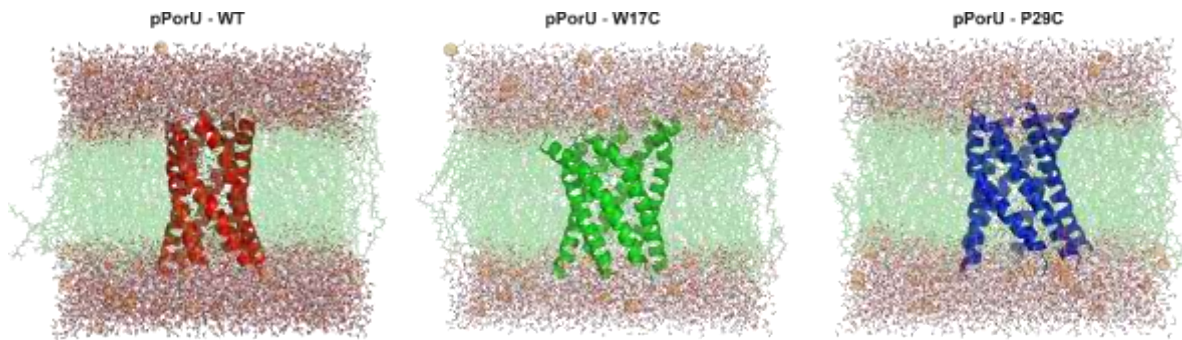

**Fig. S9: MD simulations of pPorU-WT, pPorU-W17C and pPorU-P29C**

Simulated hexapeptide pore structures for the native pPorU structure (red), as well as the pPorU-W17C (green) and pPorU-P29C (blue) mutants.

Using the on-line Charmm GUI, each resulting pore was embedded into a bilayer composed of POPC, POPE and POPG lipids in a 3:1:1 ratio, with cytoplasmic and extracellular buffers (extending 15.0 Å above and below the bilayer) composed of water, 67 K<sup>+</sup> ions and 21 Cl<sup>-</sup> ions. Extensive restrained constant pressure structural refinements were carried out in NAMD, representing the structures via the Charmm 3.6 force field. Given a thermostatic temperature of 303.15K, an initial 10,000 step relaxation was performed using quadratic positional restraints on all protein backbone atoms, via a restraint scaling factor of 10.0. A second 12,500 step restraint relaxation was then conducted on the resulting system, using a scaling factor of 5.0. Four further relaxations were then conducted (of respective lengths 12,500, 25,000, 25,000, and 25,000 steps) with restraint scaling factors diminishing according to the progression 2.5, 1.0, 0.5 and 0.1). A final production simulation was then run for 4.0 nS, at constant pressure, with no positional restraints

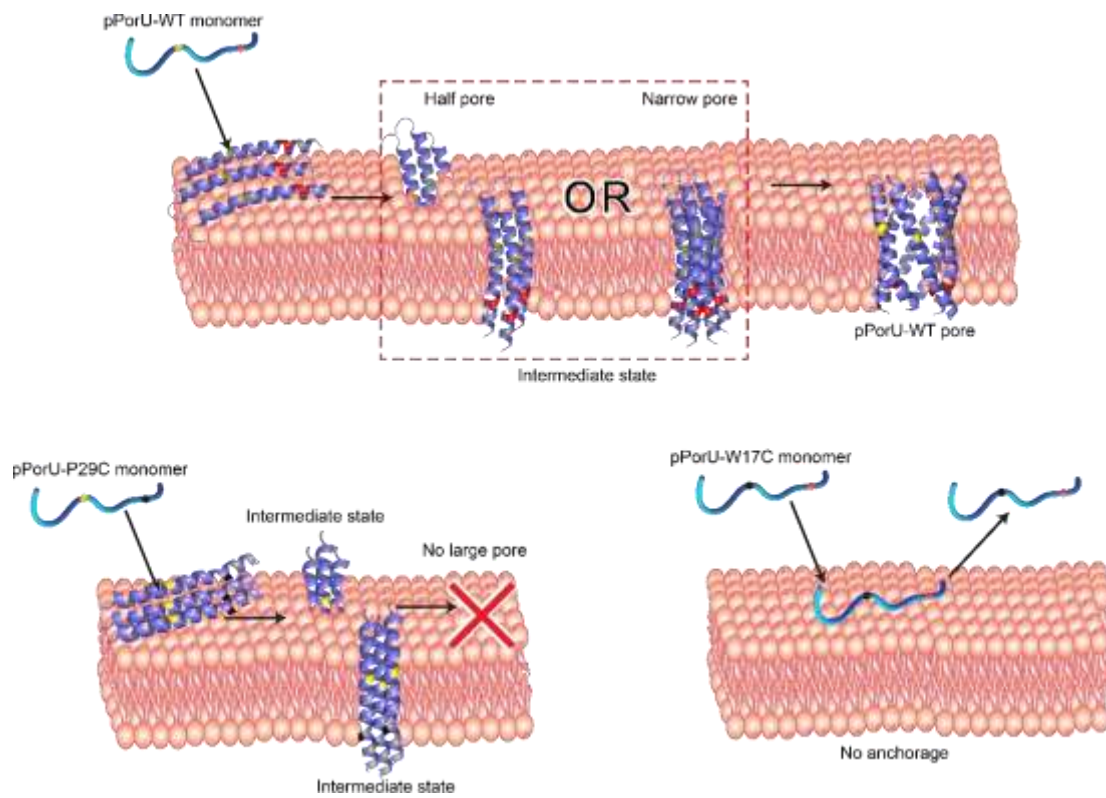

**Fig. S10: Model showing membrane insertion and pore formation of pPorU peptides**

The proposed model shows the different steps in the assembly of the large pore, including intermediate step and pore formation. The model also shows the impact of mutation of critical residues on the assembly pathway.
